# Supplementary material for: Comparative genomics of Cryptosporidium parvum reveals the emergence of an outbreak-associated population in Europe and its spread to the United States
Source: HighWire-hosted journal article supplement (doi:10.1101/gr.278830.123), 2024-06-01
Supplement: Supplemental_Table_S2.xlsx [file Supplemental_Table_S2.xlsx]

## Sheet: Foglio1
Table S2. Data filtering. Isolates marked with an X were removed from downstream analyses because of too high contamination, low read depth, presence of more than one population (mixed infection) and low size of the assembly, as indicated. Closely related isolates removed for computing Tajima's D and nucleotide diversity (pi) in Supplemental Fig. S24 are marked with *.
Isolate	Contaminations check (MetaPhlan, PhyloFlash)	Mean Read Depth < 20X	Fws > 95 (Mixed Infection)	Assembly size < 8 Mb
CN11707
CN11760
CN12405
CN24716
CN24721						x = Isolate removed
CN31727
CN42632
CN42973
CN45011
CN9592
CZ44619
CZ44621
DK-C6
DK1*
DK10	x
DK11	x
DK12	x
DK13		x
DK14	x
DK2
DK3				x
DK4
DK5		x
DK6*
DK7				x
DK8
DK9	x
34902
EG34902
35090
EG35090		x
EG43713
EG44409			x
EG44412			x
EG44425			x
EG44458				x
EG44492			x
EG44493
FIN1*
FIN10
FIN11
FIN12*
FIN13*
FIN14		x
FIN15*
FIN16*
FIN17*
FIN18	x
FIN19	x
FIN2*
FIN20		x
FIN21		x
FIN22*
FIN23*
FIN24*
FIN3*
FIN4*
FIN5*
FIN6*
FIN7	x
FIN8*
FIN9	x
Fra1
Fra2
Fra3				x
Fra4
Fra5
Fra6
Fra7*
Fra8	x
GER13
GER15
GER16*
GER17
GER20
GER21
GER22
GER23
GER24
GER25			x
GER26
GER27
GER28
GER29
GER30
GER31			x
Hun1
Hun11			x
Hun12			x
Hun2*
Hun3*
Hun4			x
Hun5			x
Hun6			x
Hun7*
Hun8			x
Hun9*
IOWA-ATCC
IT-C10
IT-C12
IT-C13
IT-C14			x
IT-C320
IT-C366
IT-C385*
IT-C386				x
IT-C388				x
IT-C389				x
IT-C390
IT-C391
IT-C392
IT-C393
IT-C394			x
IT-C395
IT-C6
IT-C7
IT-C8
IT-C9
IT-L1
IT-L2			x
IT-L3
IT-L4
IT-L5			x
IT-To			x
IT-Ve			x
Nor1
Nor2
Nor3
Nor4
Pol1
Pol2
Prt1
Slo1
Slo2
Slo4
Slo5
Slo7
Slo9
Spa1		x
Swe1
Swe2*
Swe3*
SweH1		x
SweH2
SweH3	x
SweH4
UKP1
UKP102
UKP103*
UKP104
UKP106
UKP107
UKP118*
UKP119	x
UKP120
UKP121*
UKP122*				x
UKP123		x
UKP124
UKP125
UKP126		x
UKP130
UKP131*				x
UKP132	x
UKP133
UKP134
UKP135	x
UKP2
UKP3
UKP4
UKP5		x
UKP6
UKP7
UKP8
UKP90*
UKP94
UKP95
Uppsala1499				x
US38783
US41560
US41562
US41565
US41566
US41883
US41886
US41889
US42429
US42435
US42554
US42556
US42557
US42561
US42562		x
US42564
US44519
