# Supplementary material for: Comparative genomics of Cryptosporidium parvum reveals the emergence of an outbreak-associated population in Europe and its spread to the United States
Source: HighWire-hosted journal article supplement (doi:10.1101/gr.278830.123), 2024-06-01
Supplement: Supplemental_Table_S3.xlsx [file Supplemental_Table_S3.xlsx]

## Sheet: Distribution of the SNPs in the
Table S3. Distribution of Single Nucleotide Polymorphisms (SNPs) in each of the eight C. parvum chromosomes
Chromosome	Size (bp)*	N of SNPs	Average SNP rate per bp**
1	920510	3616	254
2	992704	2594	382
3	1102616	3396	324
4	1108396	3280	337
5	1086393	3356	323
6	1308616	5053	258
7	1270394	3279	387
8	1332634	3473	383
Total	9122263	28047	325
*, according to the IowaII-ATCC reference genome
**, one SNP every 254 bp
