# Supplementary material for: Comparative genomics of Cryptosporidium parvum reveals the emergence of an outbreak-associated population in Europe and its spread to the United States
Source: HighWire-hosted journal article supplement (doi:10.1101/gr.278830.123), 2024-06-01
Supplement: Supplemental_Table_S4.xlsx [file Supplemental_Table_S4.xlsx]

## Sheet: Foglio1
Table S4. Pairwise proportion test between chromosomes.
Chromosome VS Chromosome	1	2	3	4	5	6	7	8
1	-	4.98e-56**	3.34e-23**	8.71e-31**	8.7e-24**	436	5E-69**	1.81e-66**
2		-	3.12e-09**	1.78e-05**	1.8e-09**	3.02e-58**	1	1
3			-	627	1	3.28e-23**	7.54e-12**	5.56e-11**
4				-	573	2.28e-31**	3.1e-07	1.63e-06**
5					-	1.6e-22**	3.82e-12**	2.88e-11**
6						-	8.57e-72**	9.05e-71**
7							-	1
8								-
