# Supplementary material for: Comparative genomics of Cryptosporidium parvum reveals the emergence of an outbreak-associated population in Europe and its spread to the United States
Source: HighWire-hosted journal article supplement (doi:10.1101/gr.278830.123), 2024-06-01
Supplement: Supplemental_Table_S7.xlsx [file Supplemental_Table_S7.xlsx]

## Sheet: Foglio1
Table S7. List of 16 proteins considered under selective pressure by both the Fst statistics and BUSTED.
Chromosome	Protein ID	Annotation
2	QOY42970.1	Secreted GGC gene family protein
2	QOY42972.1	Uncharacterized protein
2	QOY43020.1	ATP-dependent 6-phosphofructokinase
2	QOY43058.1	Ring domain containing protein
3	QOY42780.1	Secreted insulinase like peptidase
3	QOY42785.1	Metallo-dependent phosphatase-like
4	QOY42051.1	Ankyrin repeat containing protein
4	QOY42052.1	Ankyrin repeat containing protein
6	QOY40988.1	putative Secreted Protein
6	QOY41038.1	Ataxin-2 C-terminal/MIF4G domain containing protein
6	QOY41078.1	Uncharacterized protein
6	QOY41086.1	Cdc39p protein-like C-terminal Not1, 2CCCR4-Not complex component Not1
6	QOY41087.1	Clathrin/coatomer adaptor N-terminal
6	QOY41105.1	Zinc finger, 2CRING/FYVE/PHD-type domain containing protein
7	QOY40784.1	RNA helicase, 2CDEAD-box type, 2CQ motif domain containing protein
8	QOY39831.1	AP2/ERF domain containing protein
